# Supplementary material for: Light-gated specific oxidase-like activity of a self-assembled Pt(ii) nanozyme for environmental remediation
Source: Royal Society of Chemistry journal article supplement (doi:10.1039/d3nr02081a), 2023-01-01
Supplement: d3nr02081a1.pdf [file d3nr02081a1.pdf]

# **Light-gated specific oxidase-like activity of self-assembled Pt(II) nanozyme for environmental remediation**

**Rohit Kapila,<sup>1</sup> Bhaskar Sen,<sup>1</sup> Alisha Kamra,<sup>1</sup> Shana Chandran,<sup>1</sup> and Subinoy Rana<sup>1\*</sup>**

<sup>1</sup>Materials Research Centre, Indian Institute of Science, C. V. Raman Road, Bangalore 560012, Karnataka, India

**\*Corresponding author**

Dr. Subinoy Rana

E-mail: [subinoy@iisc.ac.in](mailto:subinoy@iisc.ac.in)

Phone: 080-22932914

## Instrumentation

$^1\text{H}$  and  $^{13}\text{C}$  NMR spectra were recorded on Bruker Ultrashield AV400 (400 MHz) and Bruker AV500 (500 MHz) high-resolution multinuclear FT-NMR spectrometers and chemical shifts were expressed in ppm using a residual protic solvent as the internal standard. All the NMR data were processed in MestreNova Lite software. The ESI-HRMS of ligands were recorded on a Xevo G2-XS Q-TOF instrument. Whereas, the mass of metal complexes was recorded on an Agilent 6540 UHD Accurate-Mass Q-TOF spectrometer. The UV-Vis absorption spectra, photoluminescence (PL) spectra, and kinetic analyses were acquired at room temperature using a Molecular Devices SpectraMax® M5e microplate reader. The absolute luminescence quantum yield was acquired by Quanta- $\phi$  Horiba Instrument linked with a Fluorolog spectrophotometer. The luminescence lifetimes were collected on a time-correlated single photon counting (TCSPC) lifetime fluorometer from DeltaPro™ (HORIBA Scientific). DLS measurement was performed on a Malvern Zetasizer Nano instrument. Field emission scanning electron microscope (FESEM) images were acquired using the Ultra55 FE-SEM Karl Zeiss EDS instrument with 5.0 kV emission voltage.

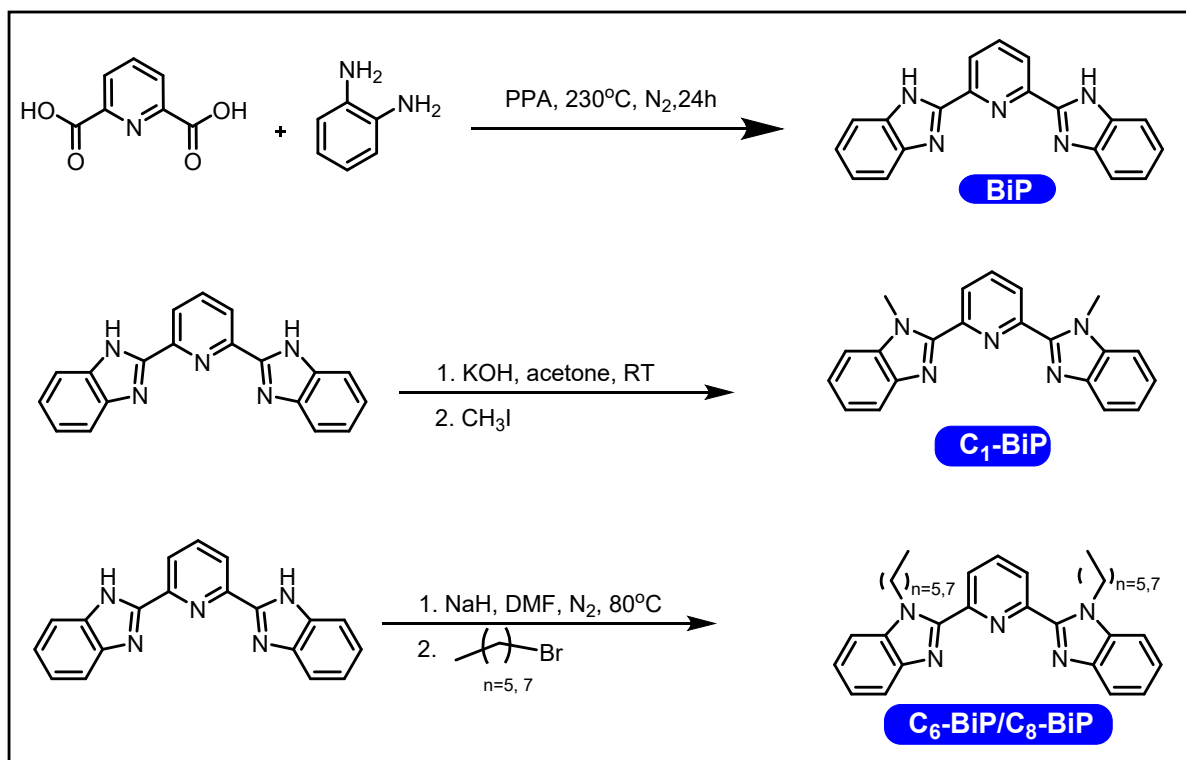

**Scheme S1.** Synthetic scheme of **BiP**, **C<sub>6</sub>-BiP**, and **C<sub>8</sub>-BiP** ligands.

**BiP:** <sup>1</sup>H NMR (400 MHz, DMSO-*d*<sub>6</sub>): δ (ppm) = 13.00 (bs, 2H), 8.35 (d, *J* = 8.3 Hz, 2H), 8.15 (t, *J* = 8.5 Hz, 1H), 7.76 (t, *J* = 4.4 Hz, 4H), 7.33-7.30 (m, 4H). <sup>13</sup>C NMR (100 MHz, DMSO-*d*<sub>6</sub>): δ (ppm) = 150.9, 148.2, 139.6, 123.6, 121.8. **HRMS (ESI)** [C<sub>19</sub>H<sub>13</sub>N<sub>5</sub> + H]<sup>+</sup>: calcd *m/z* 312.1244, found *m/z* 312.1245.

**C<sub>6</sub>-BiP:** <sup>1</sup>H NMR (400 MHz, f DMSO-*d*<sub>6</sub>): δ(ppm) = 8.31 (d, *J* = 7.9 Hz, 2H), 8.02 (t, *J* = 7.9 Hz, 1H), 7.88-7.84 (m, 2H), 7.45-7.43 (m, 2H), 7.35-7.29 (m, 4H), 4.68 (t, *J* = 7.5 Hz, 4H), 1.75-1.68 (m, 4H), 1.08-1.00 (m, 12H), 0.61 (t, *J* = 6.5 Hz, 3H). <sup>13</sup>C NMR (100 MHz, DMSO-*d*<sub>6</sub>): δ(ppm) = 150.2, 150.0, 142.8, 138.1, 136.3, 125.5, 123.5, 122.7, 120.3, 110.3, 44.9, 31.1, 30.0, 26.3, 22.3, 13.7. **HRMS (ESI)** [C<sub>21</sub>H<sub>17</sub>N<sub>5</sub> + H]<sup>+</sup>: calcd *m/z* 480.3122, found *m/z* 480.3127.

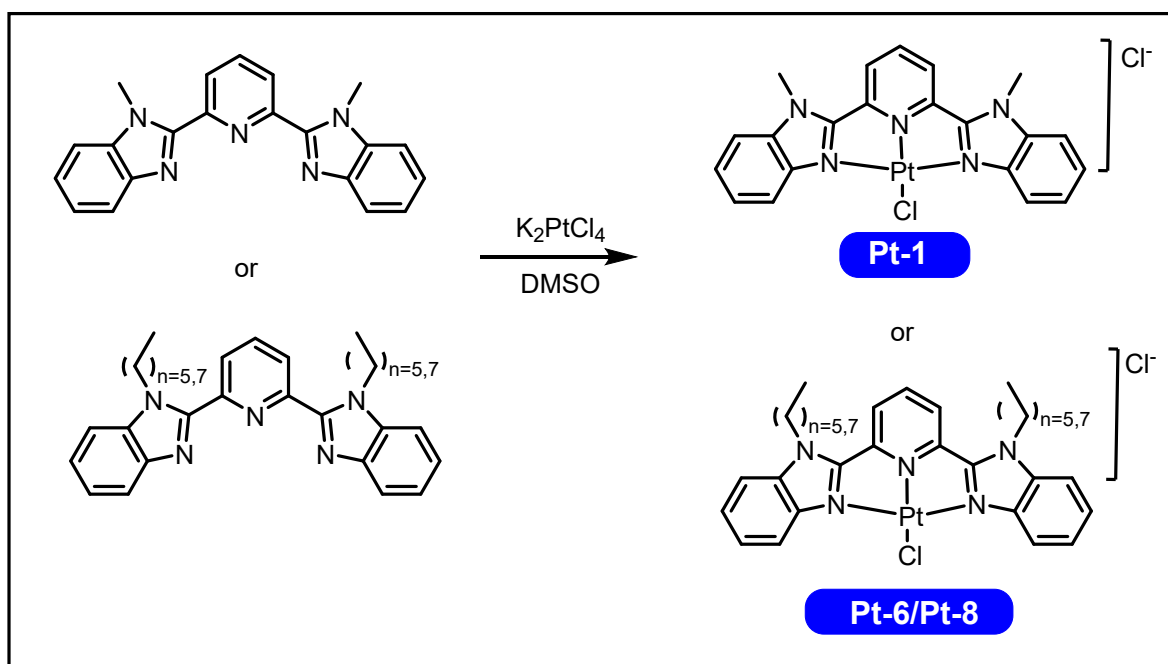

**Scheme S2.** Synthetic scheme of **Pt-1**, **Pt-6** and **Pt-8**.

**Pt-6-  $^1H$  NMR (400 MHz, DMSO- $d_6$ )**  $\delta$  8.45 (t,  $J$  = 8.1 Hz, 1H), 8.18 (d,  $J$  = 8.3 Hz, 2H), 7.60 (d,  $J$  = 8.5 Hz, 2H), 7.46 (d,  $J$  = 8.2 Hz, 2H), 7.34 (t,  $J$  = 7.7 Hz, 2H), 7.07 (t,  $J$  = 7.5 Hz, 2H), 4.31 (t,  $J$  = 6.5 Hz, 4H), 1.74-1.67 (m, 4H), 1.41-1.26 (m, 12H), 0.90 (t,  $J$  = 6.9 Hz, 6H).  **$^{13}C$  NMR (100 MHz, DMSO- $d_6$ )**  $\delta$  151.8, 146.9, 138.0, 133.5, 126.4, 126.0, 123.9, 115.36, 112.5, 40.4, 30.8, 29.6, 25.3, 21.9, 13.8. Calculated mass with isotopic distribution as shown in inset Fig. S9.

**Pt-1-  $^1H$  NMR (400 MHz, DMSO- $d_6$ ):**  $\delta$  8.49 (t,  $J$  = 8.1 Hz, 1H), 8.31 (d,  $J$  = 8.1 Hz, 2H), 7.44 (d,  $J$  = 8.0 Hz, 2H), 7.28 (t,  $J$  = 7.4 Hz, 2H), 7.16 (t,  $J$  = 7.6 Hz, 2H), 6.94 (d,  $J$  = 8.1 Hz, 2H), 3.81 (s, 6H).  **$^{13}C$  NMR (100 MHz, DMSO- $d_6$ ):**  $\delta$ (ppm) = 53.1, 147.6, 142.9, 138.2, 133.9, 126.8, 126.0, 125.2, 115.5, 112.6, 32.7. **HRMS (ESI)**  $[C_{21}H_{17}ClN_5Pt]^+$ : calcd  $m/z$  569.0815, found  $m/z$  569.0809

**Pt-8-  $^1H$  NMR (400 MHz,  $CDCl_3$ ):**  $\delta$  8.95 (bs, 1H), 8.42 (bs, 2H), 7.64 (d,  $J$  = 8.0 Hz, 2H), 7.26m (t,  $J$  = 7.1 Hz, 2H), 7.12 (t,  $J$  = 7.1 Hz, 2H), 6.89 (d,  $J$  = 8.1 Hz, 2H), 4.5 (bs, 4H), 1.84 (bs, 6H), 1.44-1.26 (m, 18H), 0.87 (s,  $J$  = 7.1 Hz, 6H).  **$^{13}C$  NMR (100 MHz,  $CDCl_3$ )**  $\delta$  152.2, 147.3, 139.0, 133.9, 126.8, 125.9, 124.8, 117.1, 111.1, 44.5, 31.8, 30.4, 29.33, 29.1, 22.6, 14.1. Calculated mass with isotopic distribution as shown in inset Fig. S9.

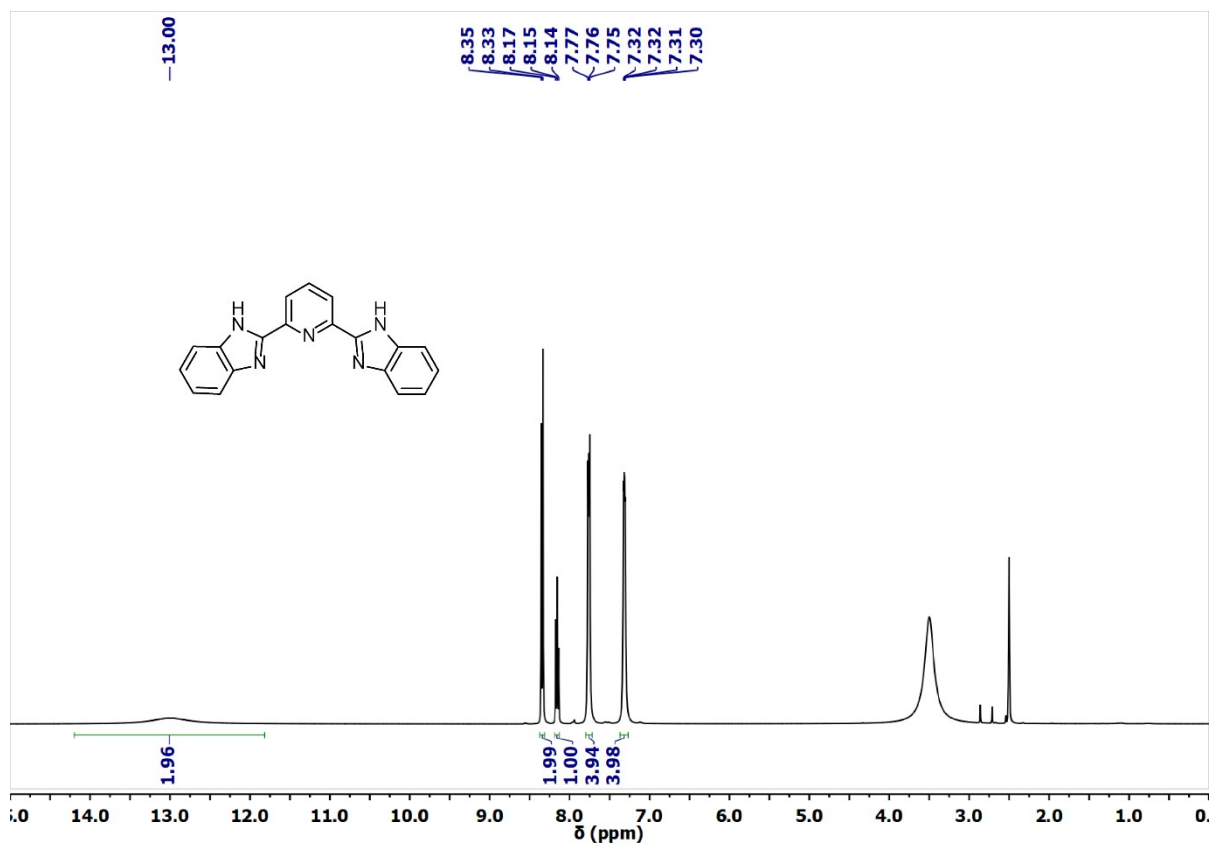

Fig. S1.  $^1\text{H}$  NMR spectrum of BiP in  $\text{DMSO-}d_6$ .

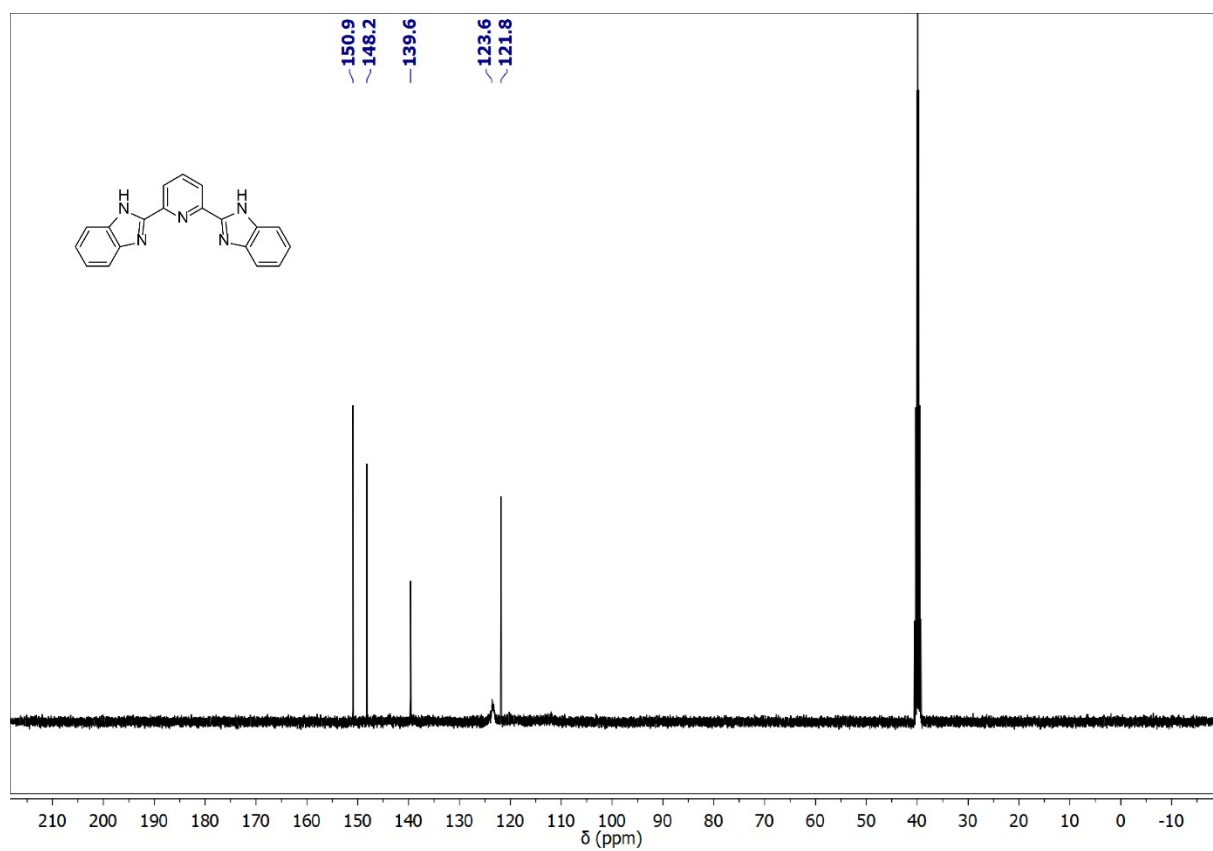

Fig. S2.  $^{13}\text{C}$  NMR spectrum of BiP in  $\text{DMSO-}d_6$ .

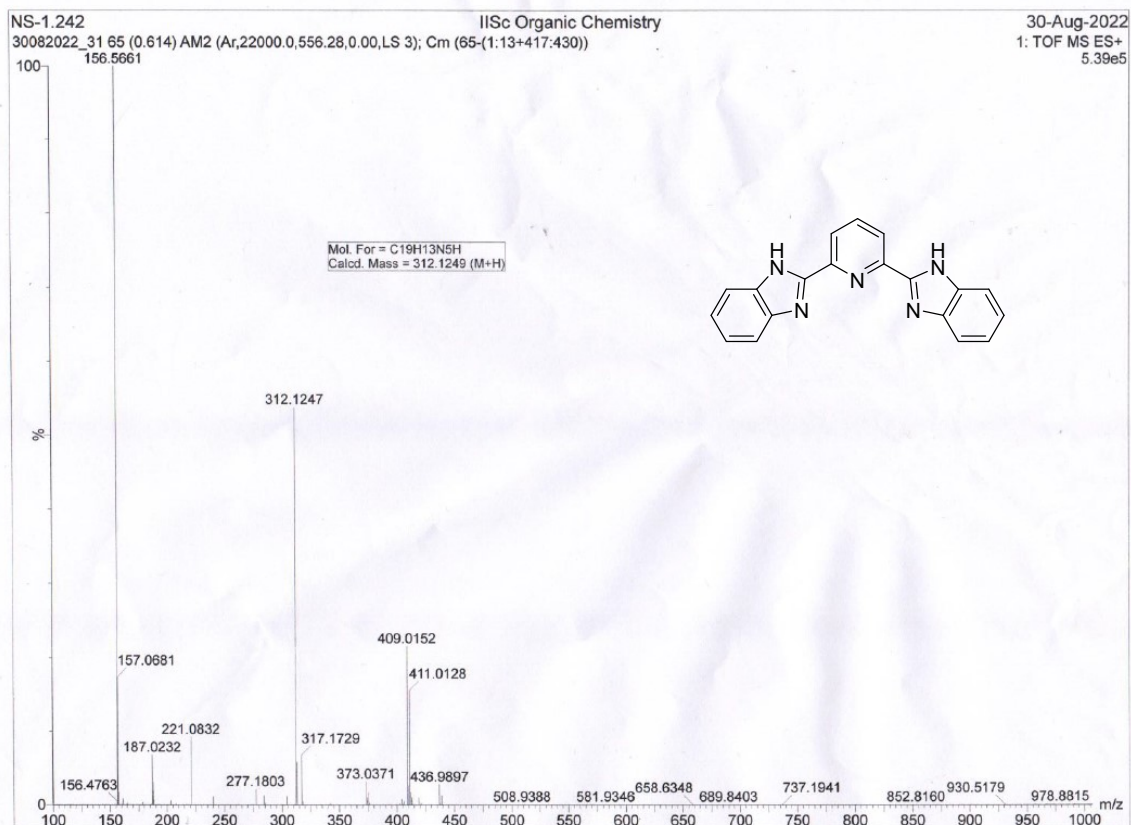

Fig. S3. ESI-HRMS of C6-BiP

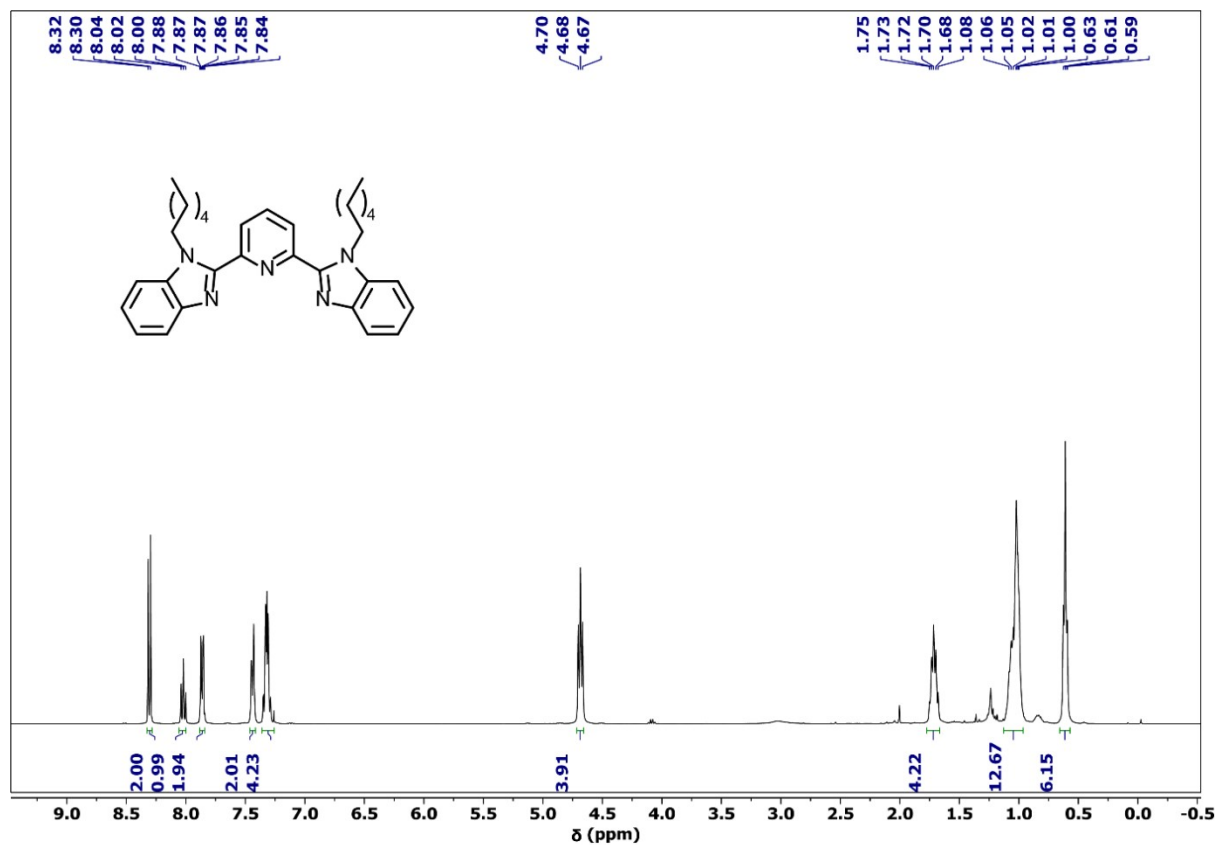

Fig. S4. <sup>1</sup>H NMR spectrum of C6-BiP in CDCl<sub>3</sub>.

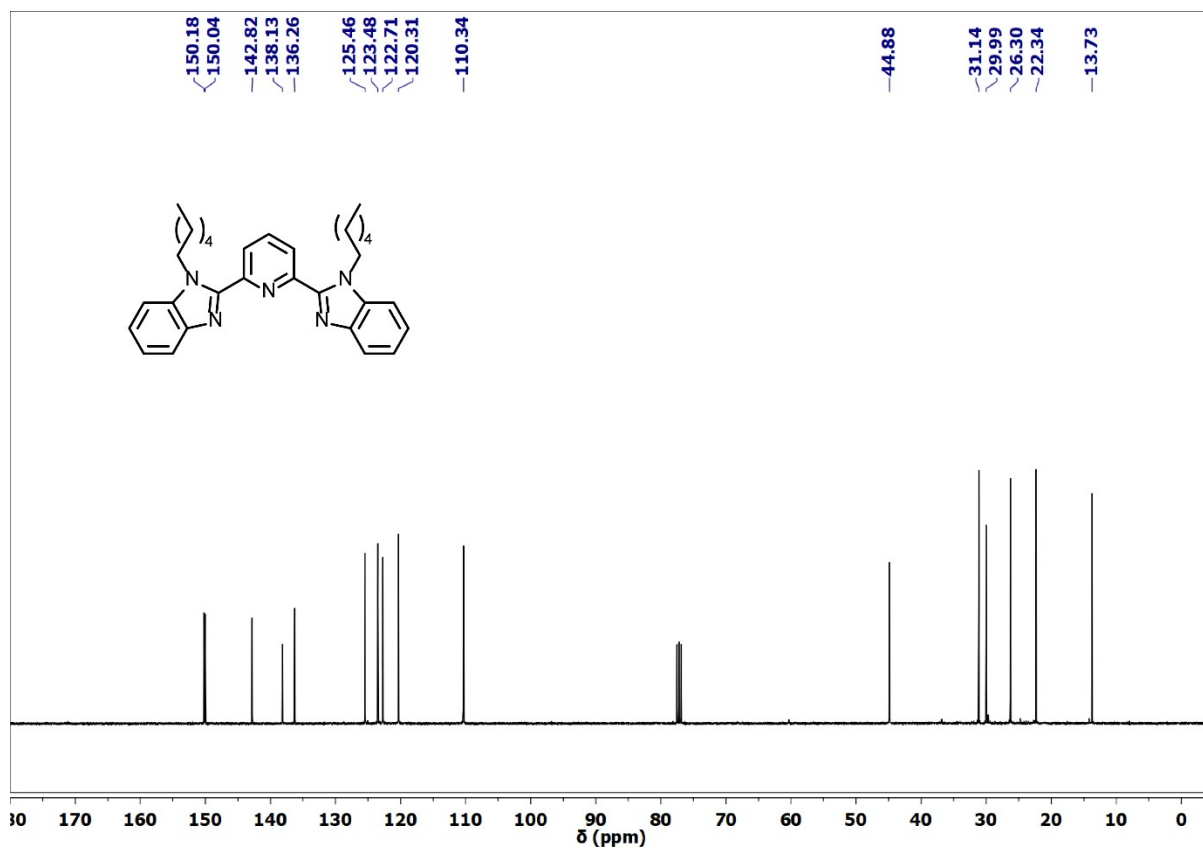

Fig. S5.  $^{13}\text{C}$  NMR spectrum of C6-BiP in  $\text{CDCl}_3$ .

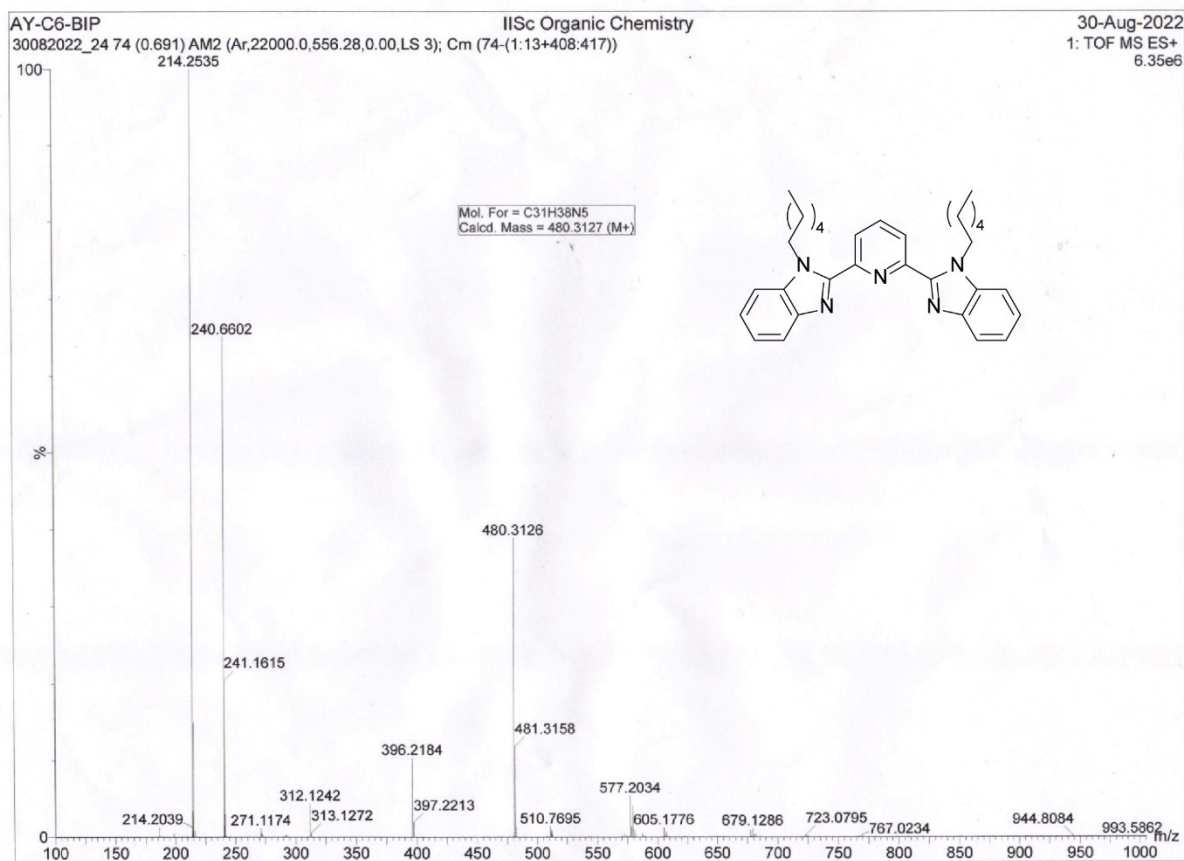

Fig. S6. ESI-HRMS of C6-BiP.

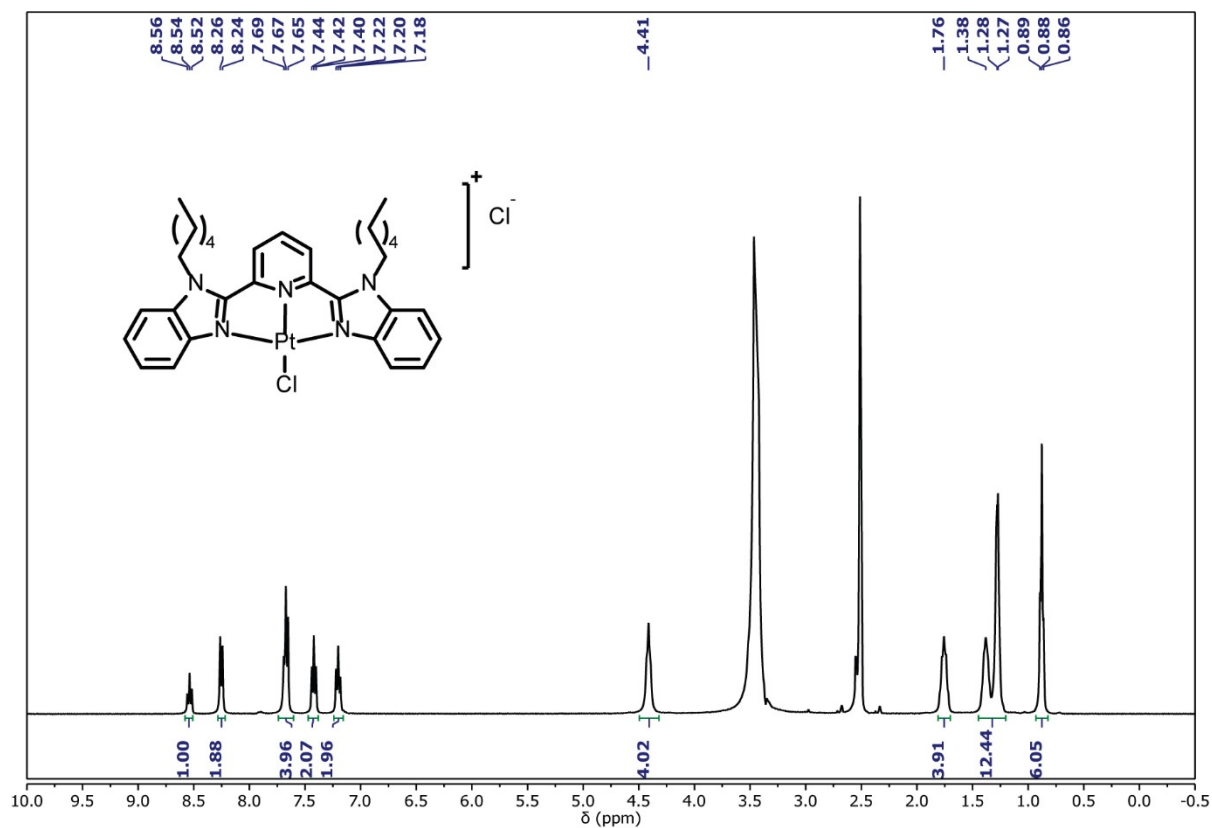

Fig. S7.  $^1\text{H}$  NMR spectrum of Pt-6 in DMSO- $d_6$ .

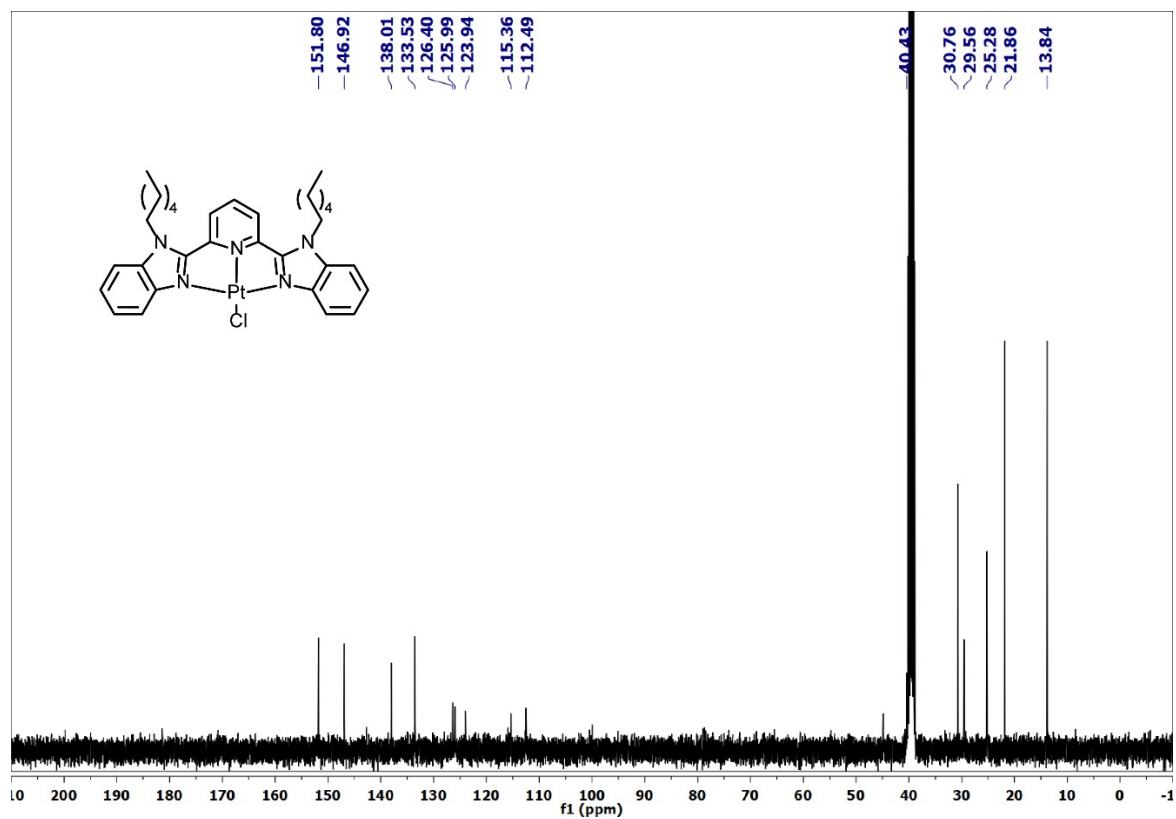

Fig. S8.  $^{13}\text{C}$  NMR spectrum of Pt-6 in DMSO- $d_6$ .



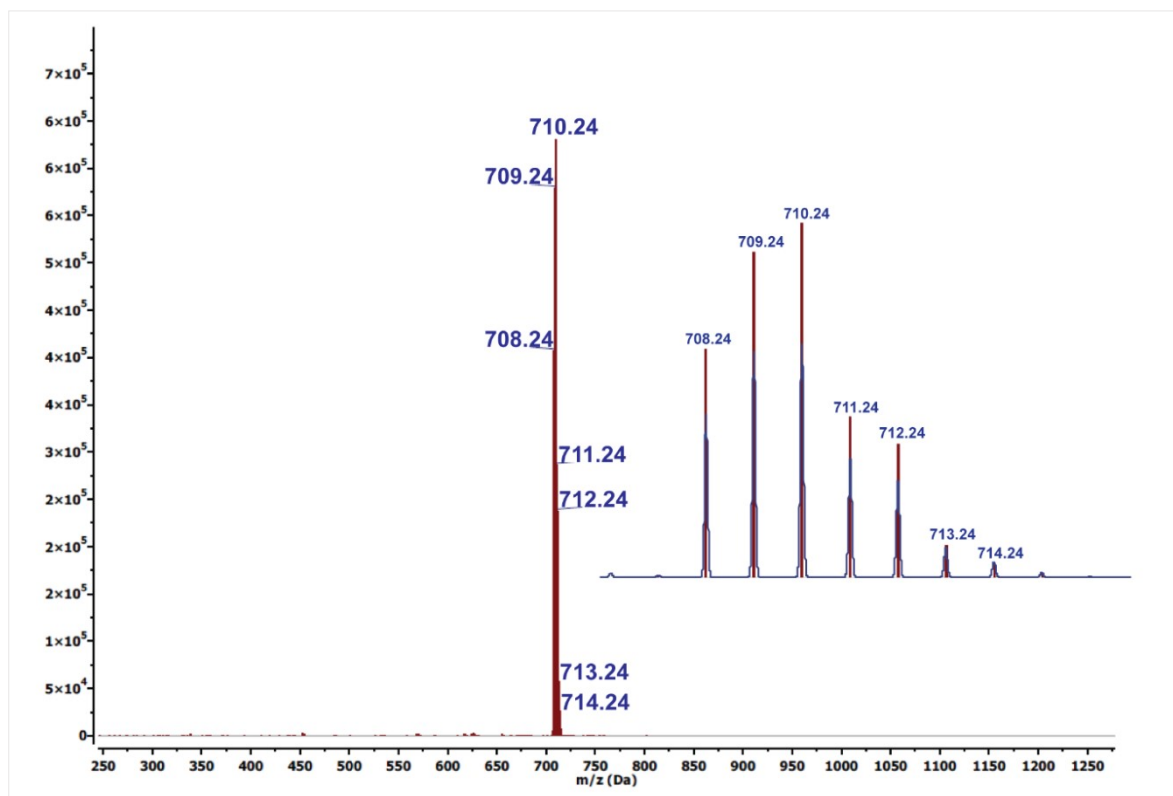

**Fig. S9.** ESI-MS of **Pt-6**. Inset: isotopic mass distribution pattern of **Pt-6**. Colour code: maroon corresponds to experimentally obtained and blue corresponds to theoretically simulated.

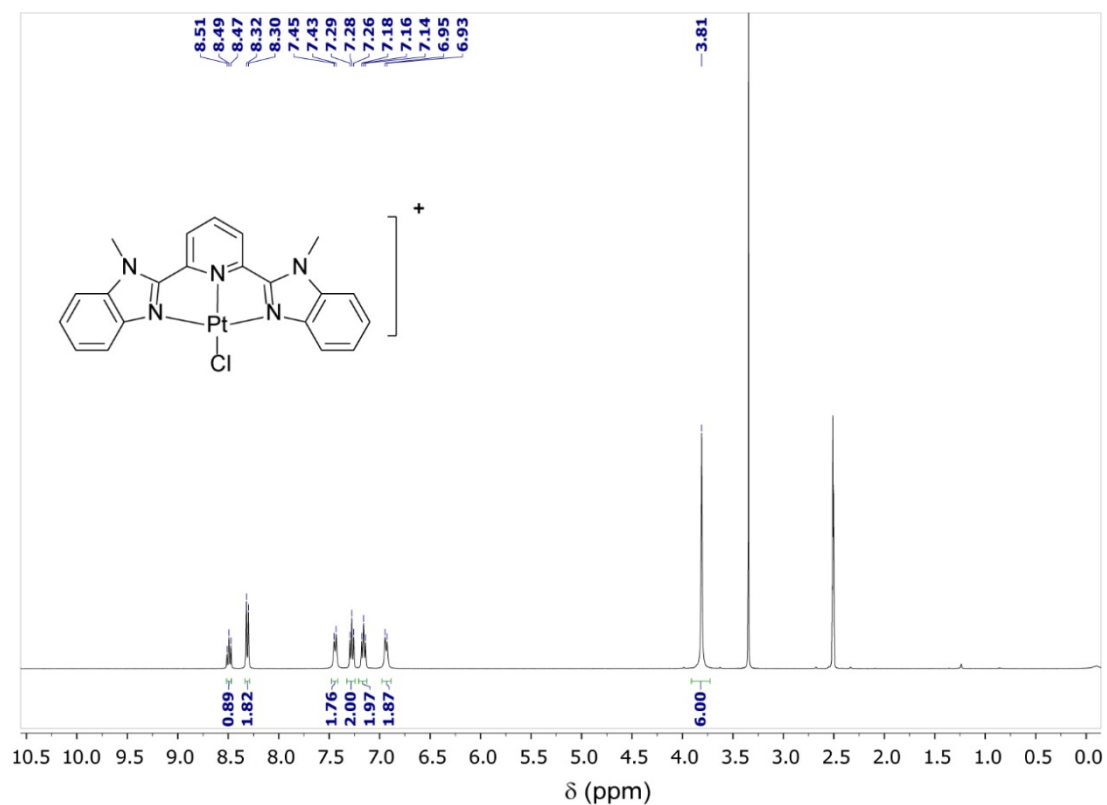

**Fig. S10a.**  $^1\text{H}$  NMR spectrum of **Pt-1** in  $\text{DMSO-d}_6$ .

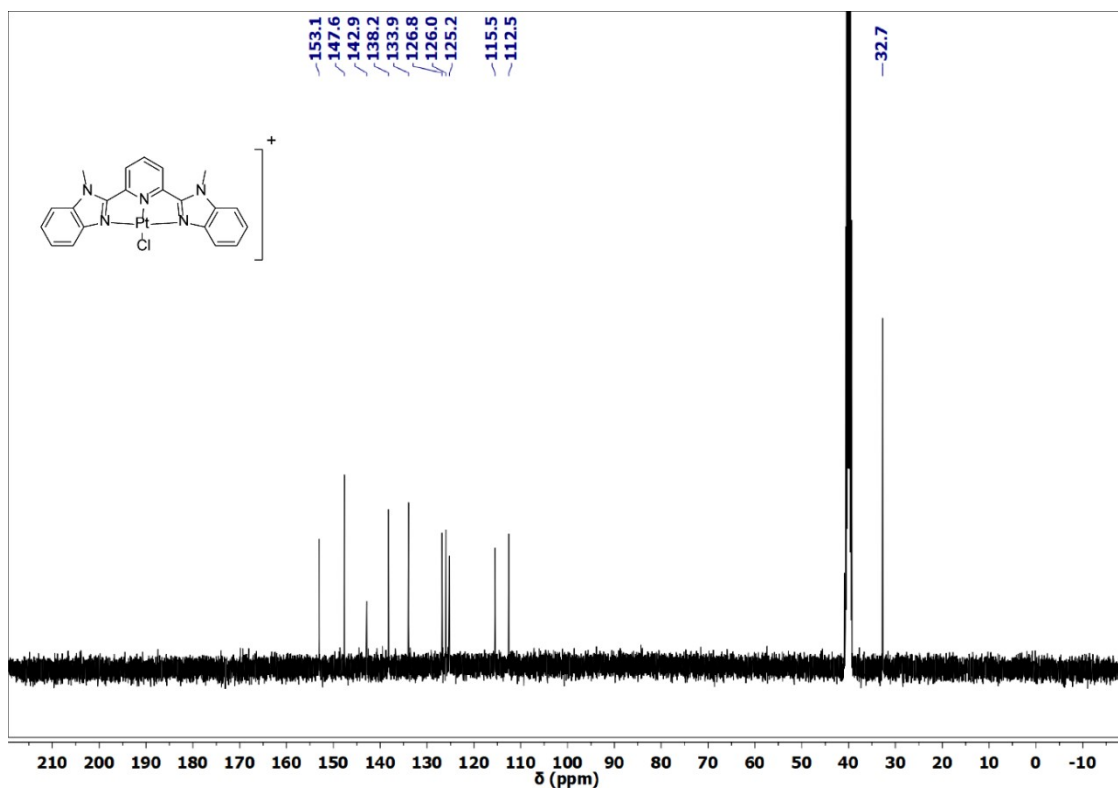

Fig. S10b.  $^{13}\text{C}$  NMR spectrum of Pt-1 in  $\text{DMSO-}d_6$ .

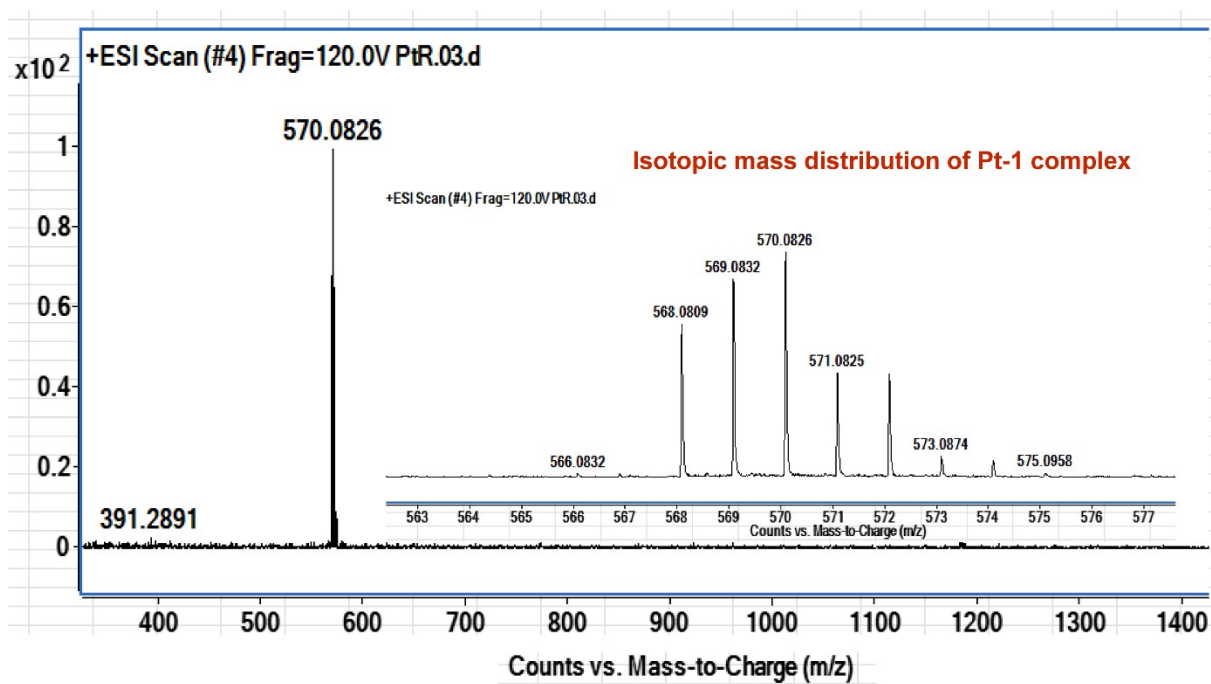

Fig.S10c. ESI-MS of Pt-1. Inset: isotopic mass distribution pattern of Pt-1

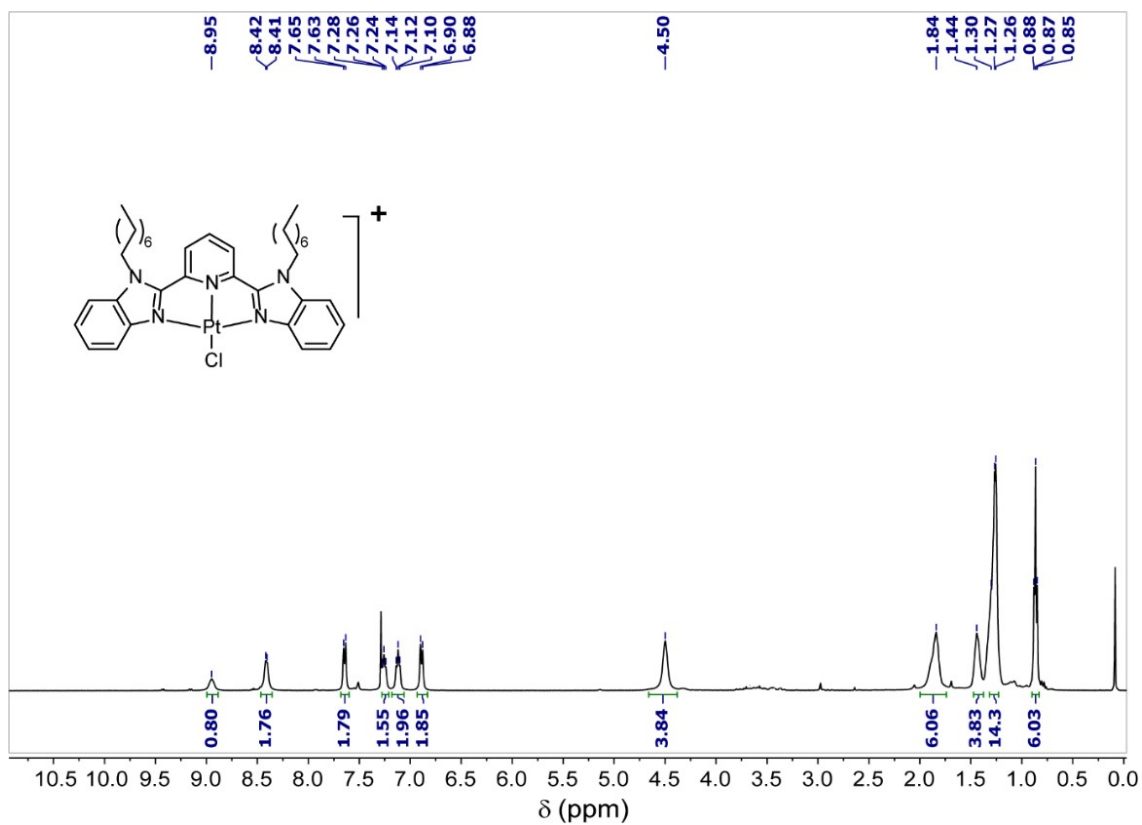

Fig. S11a. <sup>1</sup>H NMR spectrum of Pt-8 in CDCl<sub>3</sub>.

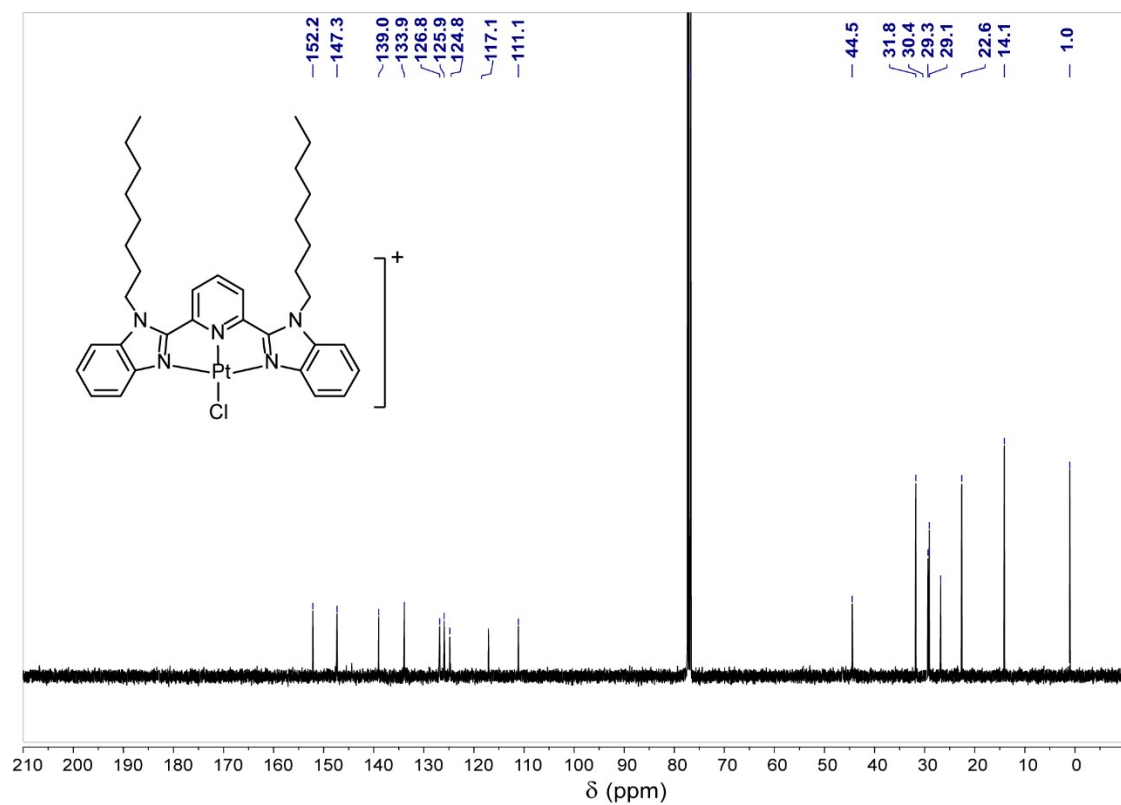

Fig. S11b. <sup>13</sup>C NMR spectrum of Pt-8 in CDCl<sub>3</sub>.

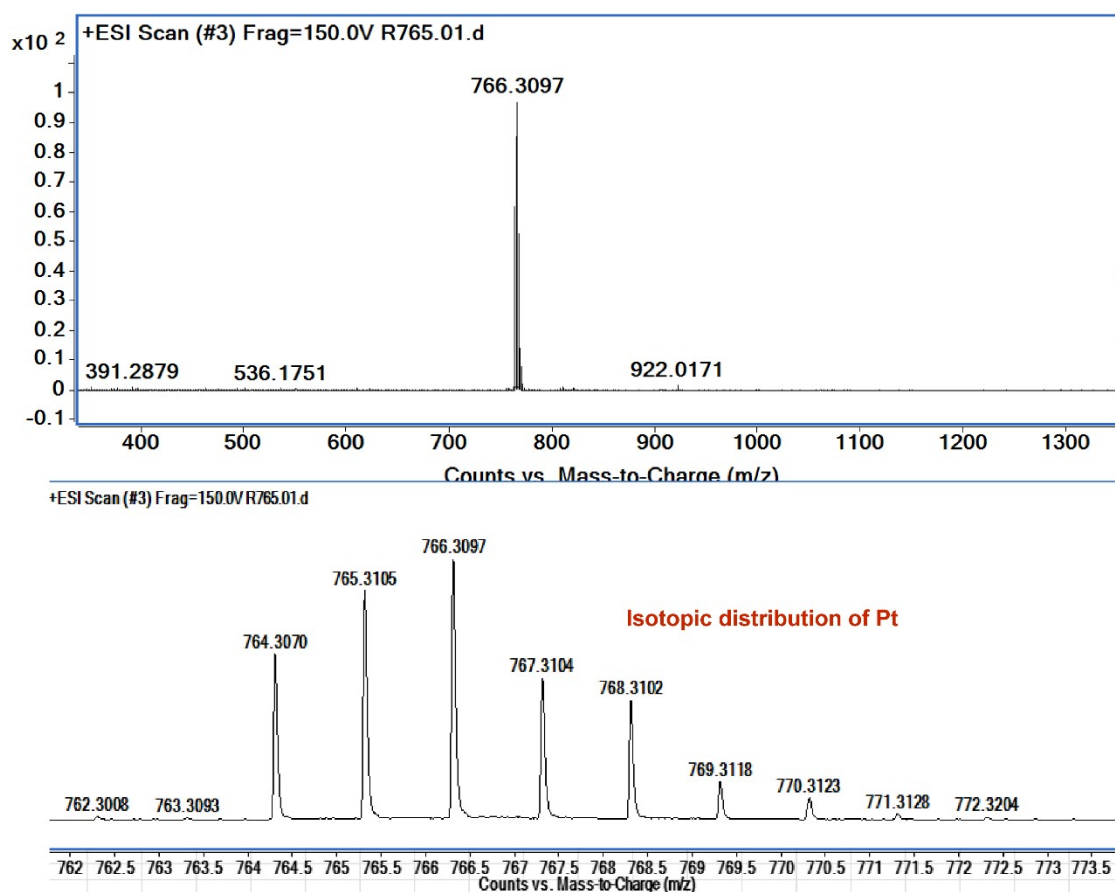

Fig. S11c. ESI-MS of Pt-8. down: isotopic mass distribution pattern of Pt-8.

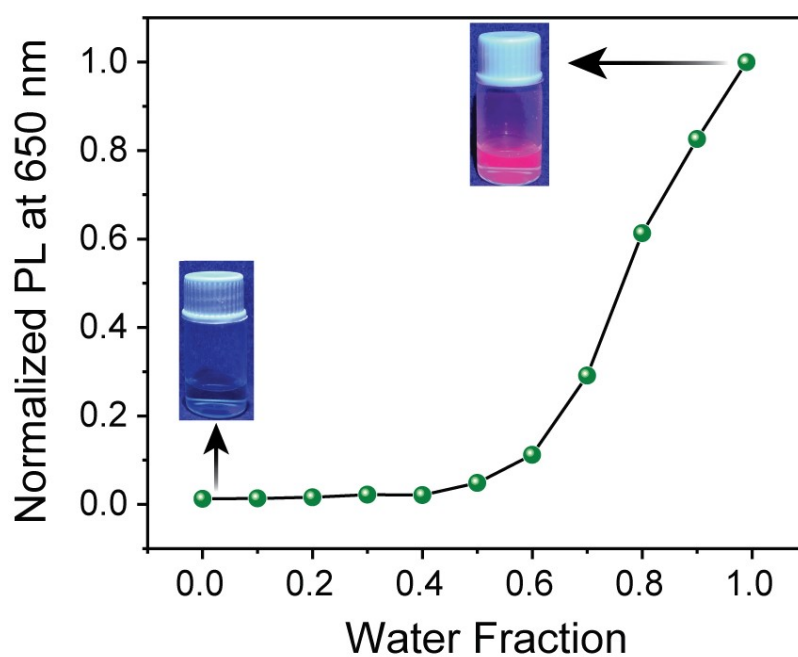

Fig. S12. Normalized PL intensity of Pt-6 at 650 nm with the increase in water fraction (0-0.99; v/v).

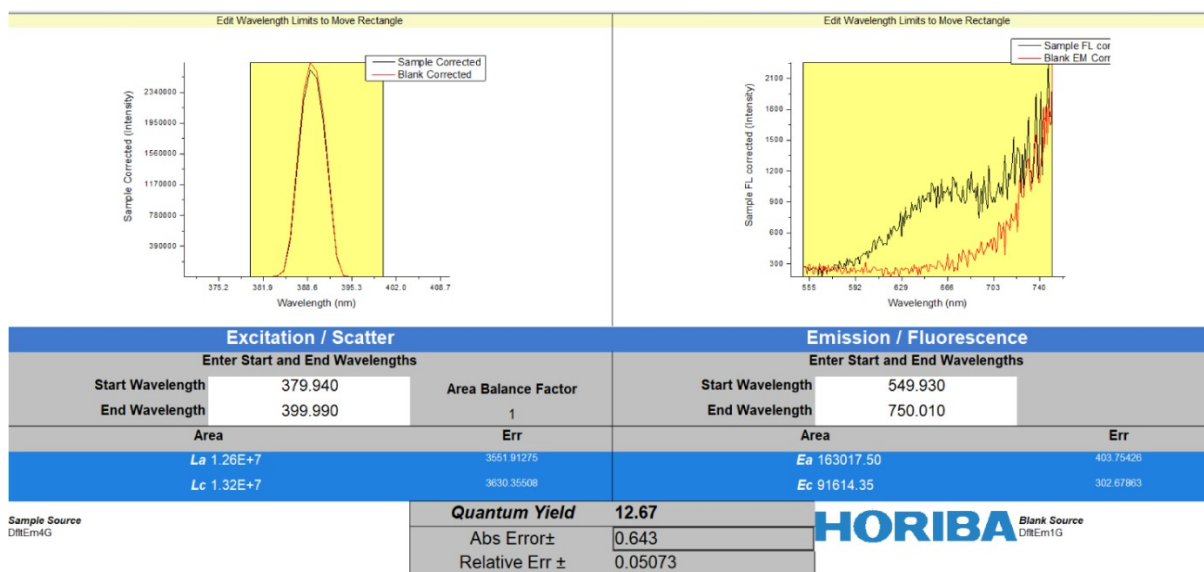

**Fig. S13.** Absolute luminescence quantum yield of **NanoPtA**

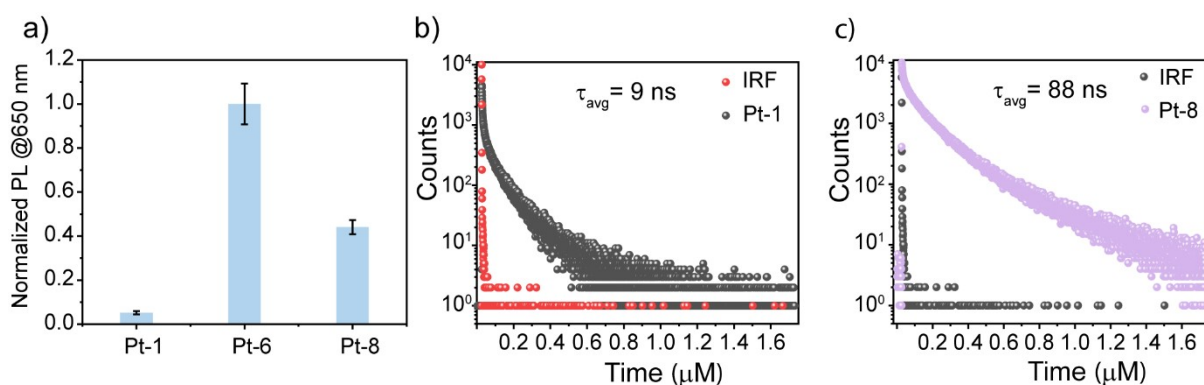

**Fig. S14.** (a) Bar plot of normalized PL intensity of **Pt-1**, **Pt-6**, and **Pt-8** (10 μM) complexes at 650 nm in 99% water-methanol mixture. Luminescence lifetime of (b) **Pt-1** and (c) **Pt-8** in 99% water-methanol solution, whereas IRF is the instrument response function.

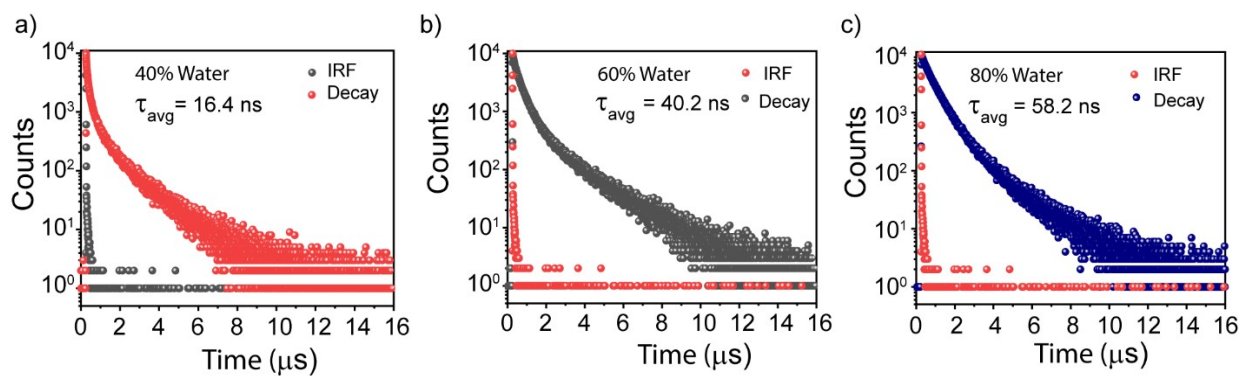

**Fig. S15.** Photoluminescence lifetime of **Pt-6** at (a) 40%, (b) 60%, and (c) 80% water fractions, whereas IRF is the instrument response function.

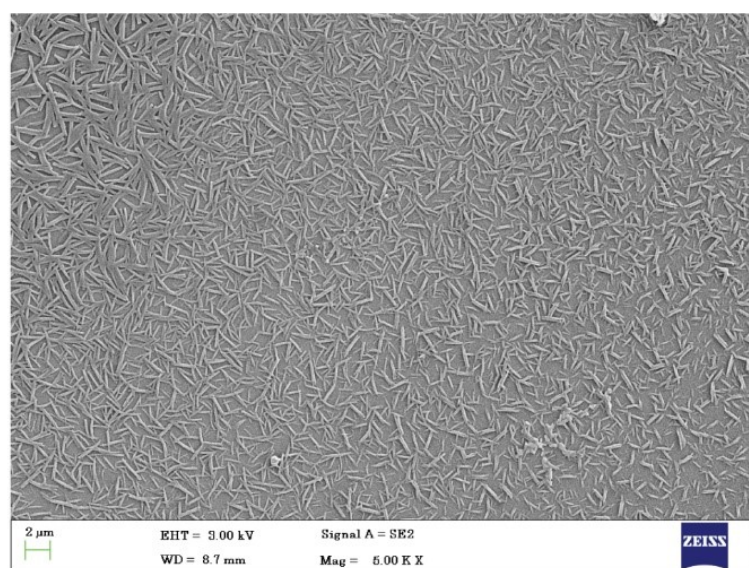

**Fig. S16.** FESEM images of **NanoPtA** assembly formed in 99% water-methanol mixture.

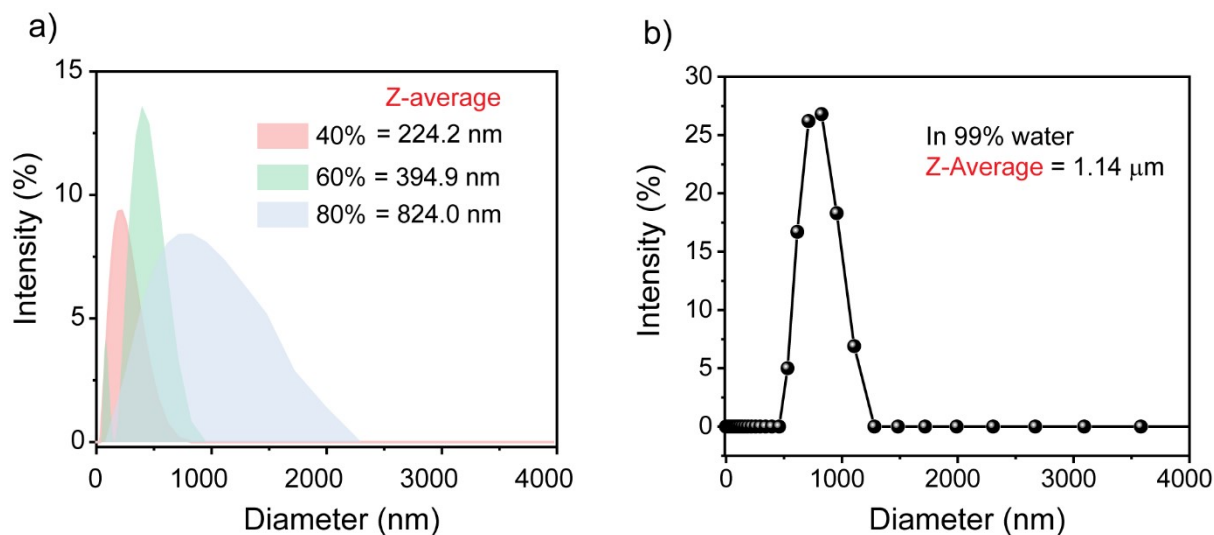

**Fig. S17.** (a) Particle size distribution of **NanoPtA** in different water fractions at 40%, 60%, and 80 % water-methanol mixture and (b) at 99% water-methanol mixture.

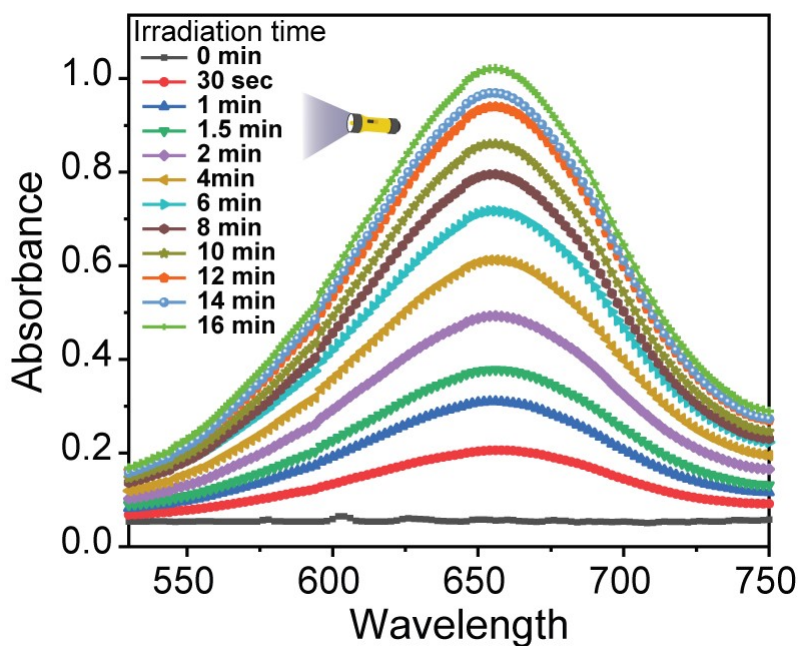

**Fig. S18.** UV absorption spectra of TMB (0.5 mM) in the presence of **NanoPtA** (10 μM) with the variation of visible light (at 470 nm) exposure time (0-16 min.) in acetate buffer (100 mM, pH 4.0).

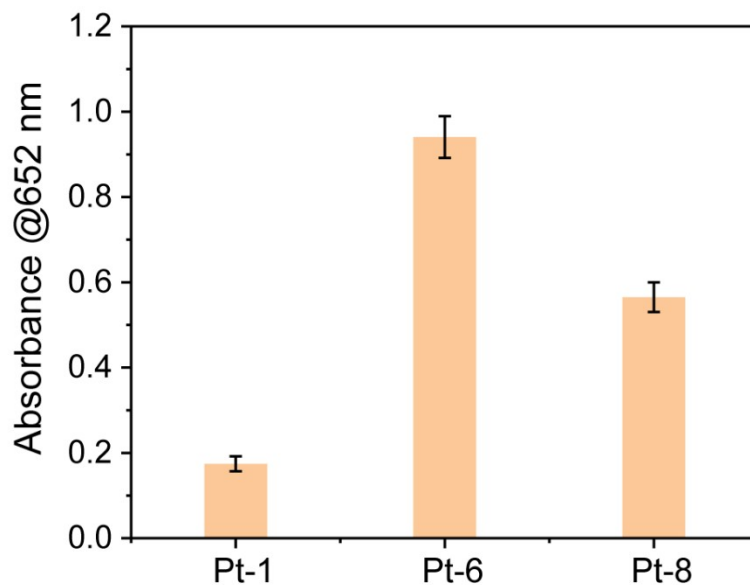

**Fig. S19.** Absorbance (at 652 nm) of TMB (0.5 mM) oxidized product upon visible light (470 nm) irradiation for 10 min in the presence of **Pt-1**, **Pt-6**, and **Pt-8** in acetate buffer (100 mM, pH 4.0).

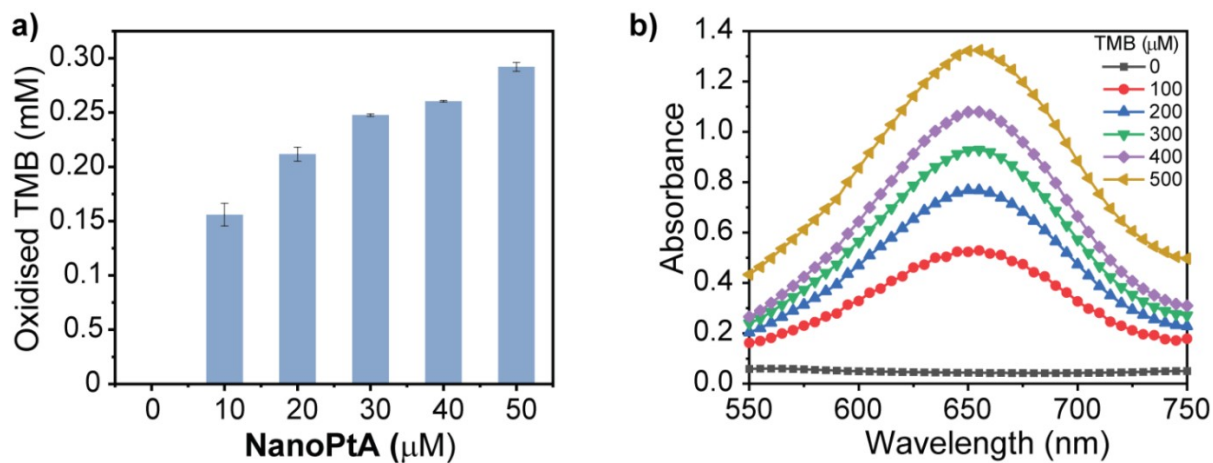

**Fig. S20.** (a) Extent of TMB oxidation with different concentrations **NanoPtA** (0-50  $\mu\text{M}$ ). (b) Absorbance plot of oxidized TMB with increasing concentration of **NanoPtA** (0-500  $\mu\text{M}$ ). Condition: medium: acetate buffer (100 mM, pH 4.0) and irradiation of sunlight for 10 min.



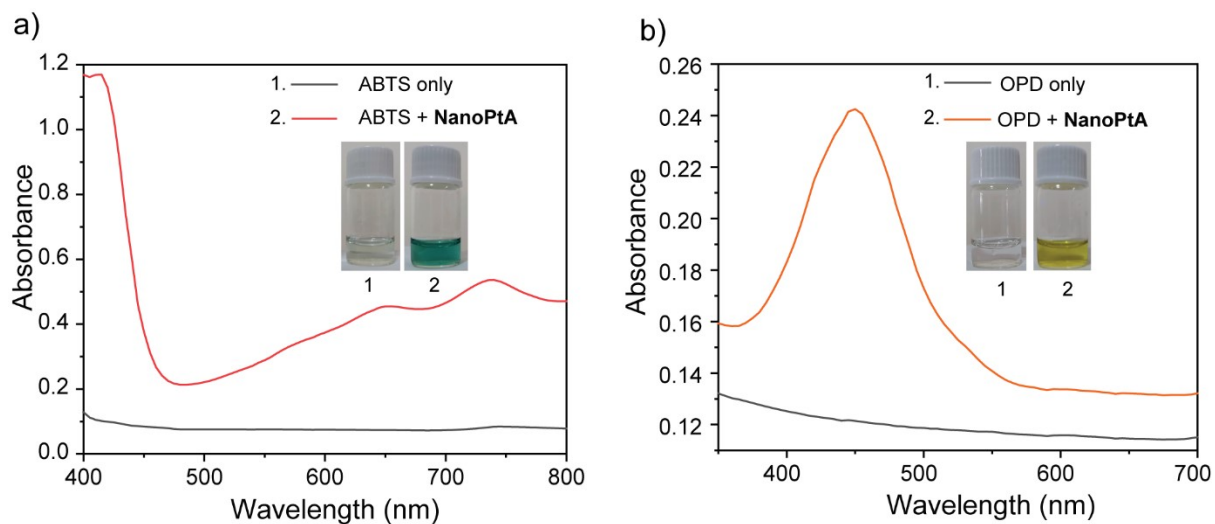

**Fig. S21. (a,b)** UV absorption spectra of ABTS (0.5 mM) and OPD (0.5 mM) in the presence of **NanoPtA** (10  $\mu$ M) upon irradiation with visible light 470 nm for 10 min. in acetate buffer (100 mM, pH 4.0).

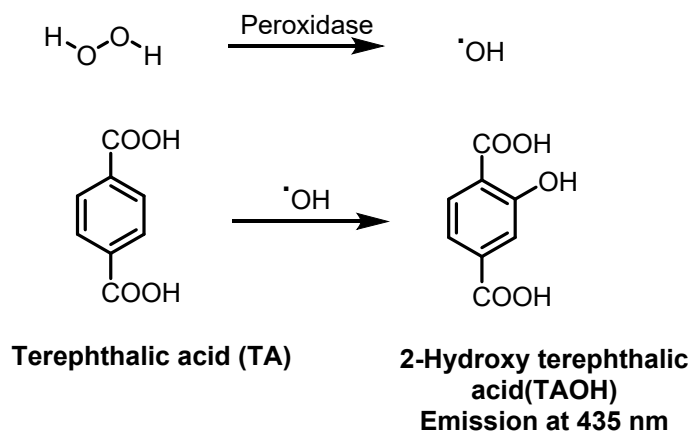

**Scheme S3.** Reactions involved in the terephthalic acid assay.

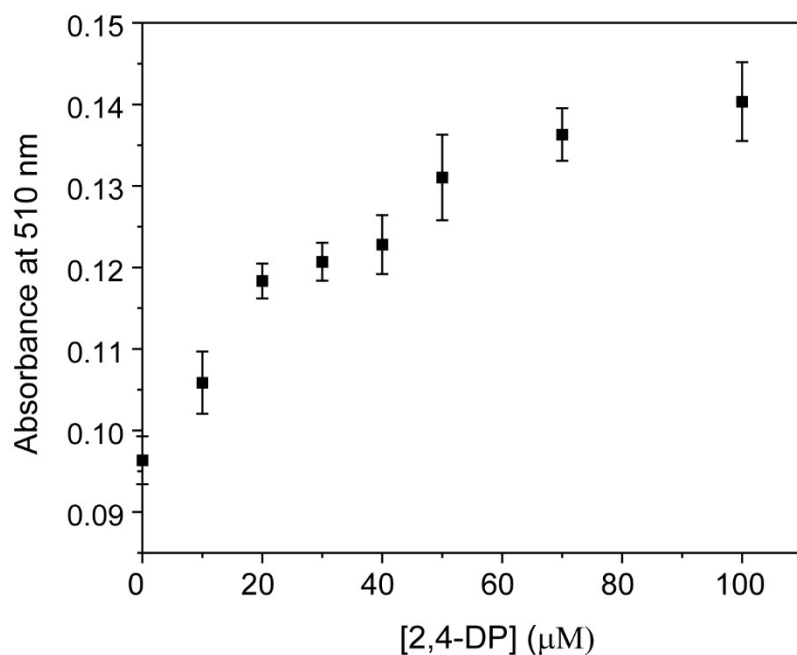

**Fig. S22.** Effect of 2,4 -DP concentrations on the catalytic activity of **NanoPtA** (10 μM) at 510 nm.

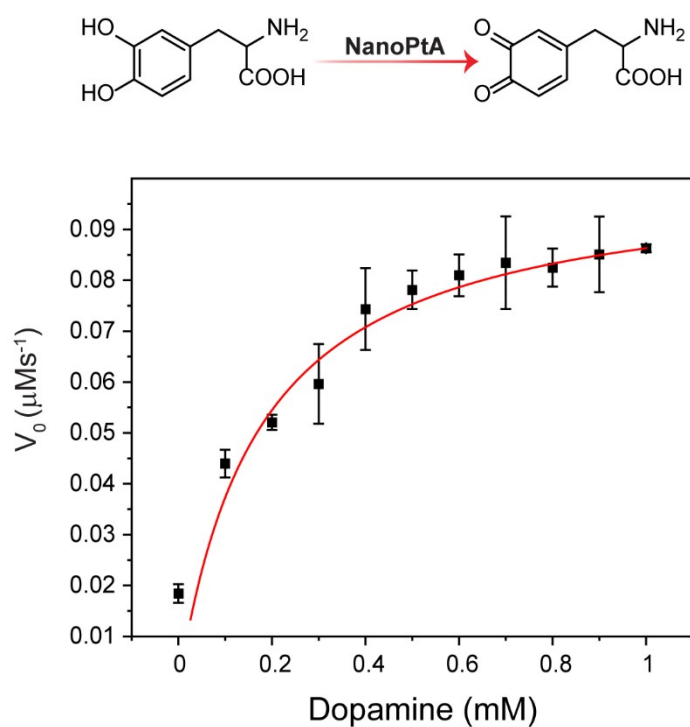

**Fig. S23.** Michaelis Menten plot of oxidized dopamine absorbance (at 475 nm) catalyzed by **NanoPtA** (10 μM) in HEPES buffer (10 mM, pH 7.4). Light source = visible light 470 nm.

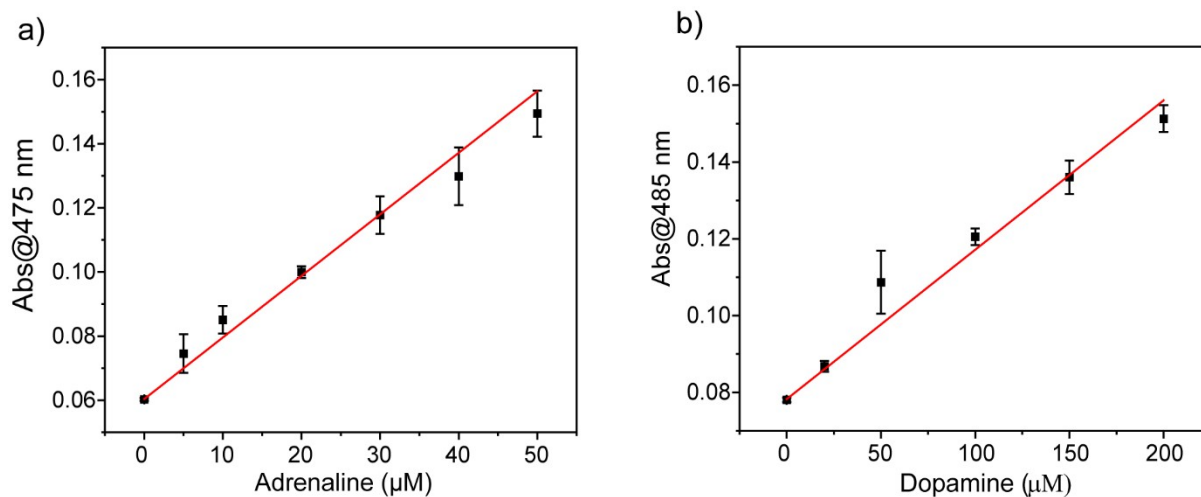

**Fig. S24.** (a) Plot of oxidized adrenaline absorbance at 475 nm versus adrenaline concentration catalyzed by **NanoPtA** (10 μM). (b) Plot of oxidized dopamine absorbance at 485 nm versus dopamine concentration catalyzed by **NanoPtA** (10 μM). The red line showed the linear fit of the data.

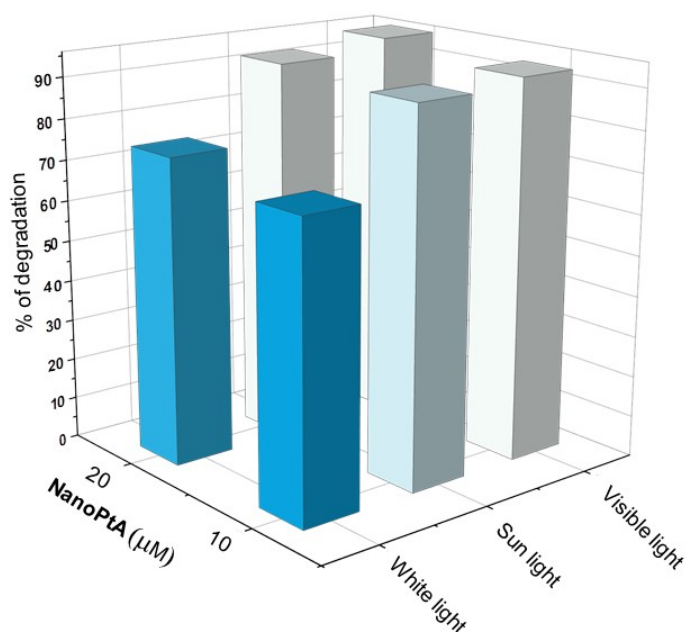

**Fig. S25.** Comparison of % trypan blue degradation under exposure to different irradiation sources in the presence of **NanoPtA** (10 μM and 20 μM). Light sources = Visible light at 470 nm, White light = 40W LED bulb, and Sunlight.

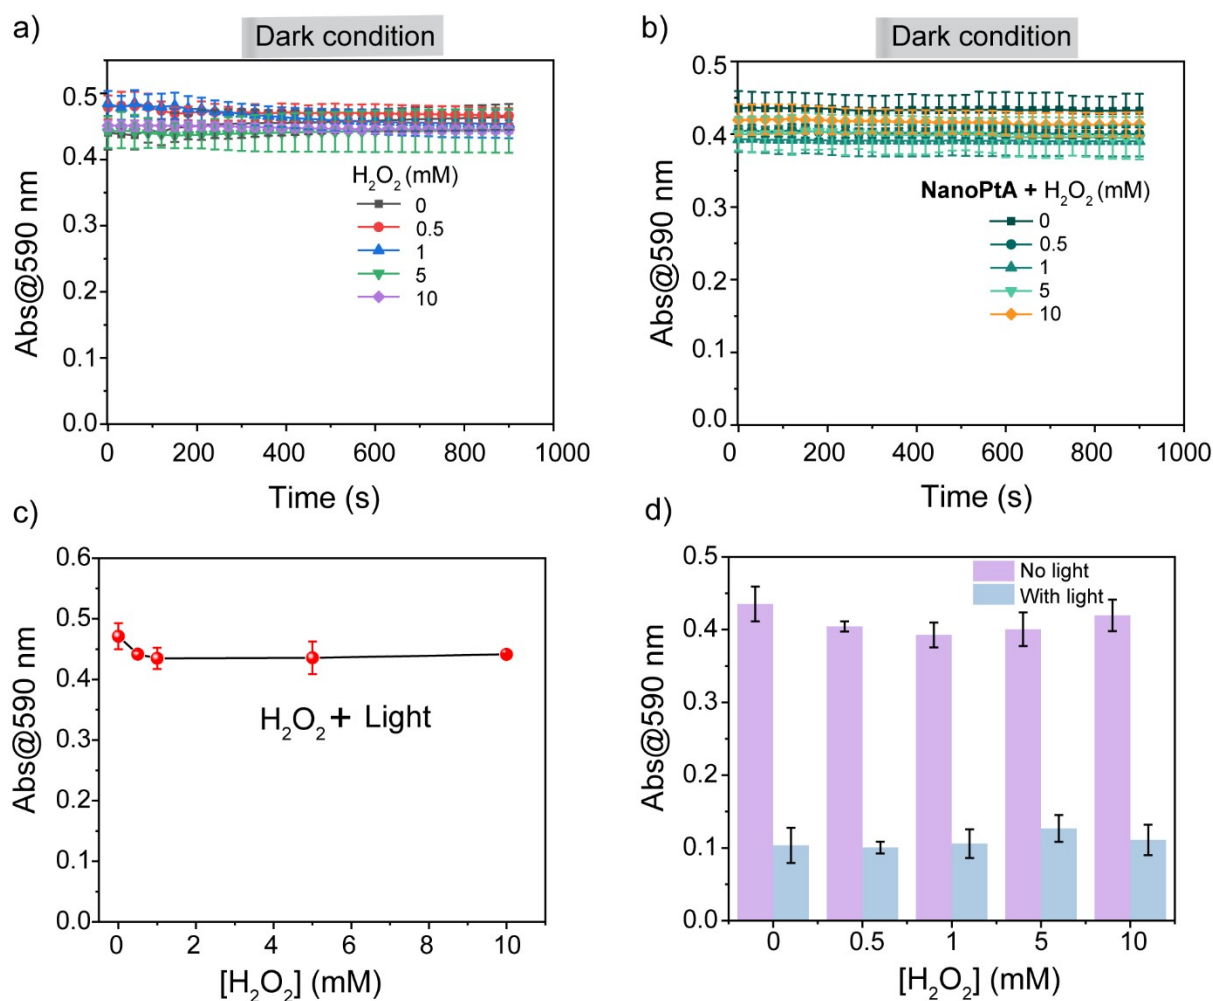

**Fig. S26.** (a) Absorbance at 590 nm for TrB dye degradation with time at various concentrations of H<sub>2</sub>O<sub>2</sub> (0, 0.5, 1.5, 10 mM) in the absence of visible light. (b) absorbance at 590 nm for TrB dye degradation with time at various concentrations of H<sub>2</sub>O<sub>2</sub> (0, 0.5, 1.5, 10 mM) with **NanoPtA** (10 μM) in the absence of visible light. (c) TrB dye degradation with time at various H<sub>2</sub>O<sub>2</sub> concentrations (0, 0.5, 1.5, 10 mM) in the presence of visible light. (d) TrB dye degradation with **NanoPtA** (10 μM) at various H<sub>2</sub>O<sub>2</sub> concentrations (0, 0.5, 1.5, 10 mM) in the absence and presence of visible light.

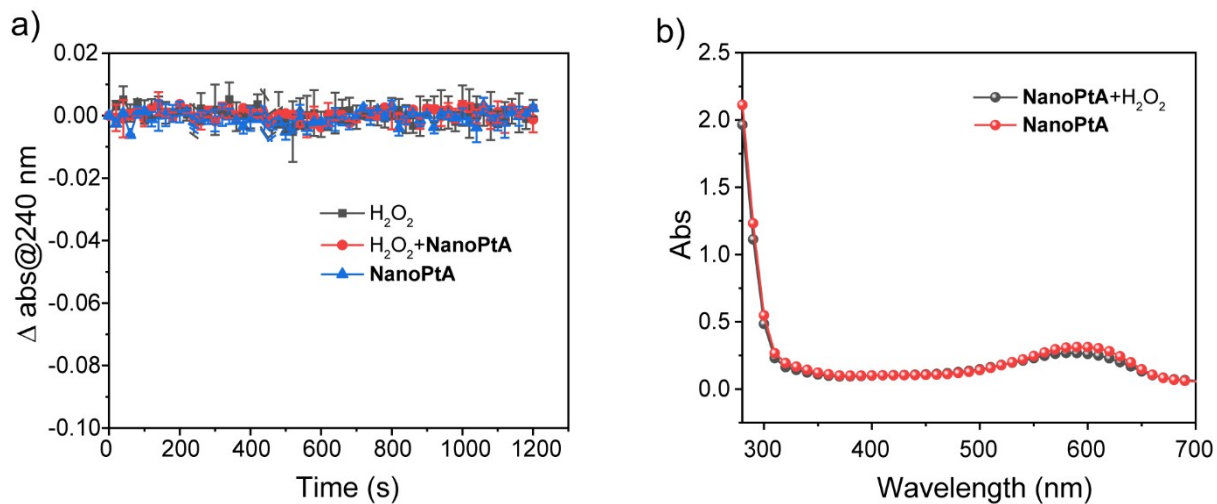

**Fig. S27.** a) Degradation of  $\text{H}_2\text{O}_2$  (25  $\mu\text{M}$ ) in the presence of **NanoPtA** (10 $\mu\text{M}$ ) over time b) Degradation of TrB dye (20  $\mu\text{M}$ ) in the presence of **NanoPtA** alone and  $\text{H}_2\text{O}_2$  and **NanoPtA** mixture after degassing the vials with  $\text{N}_2$ .

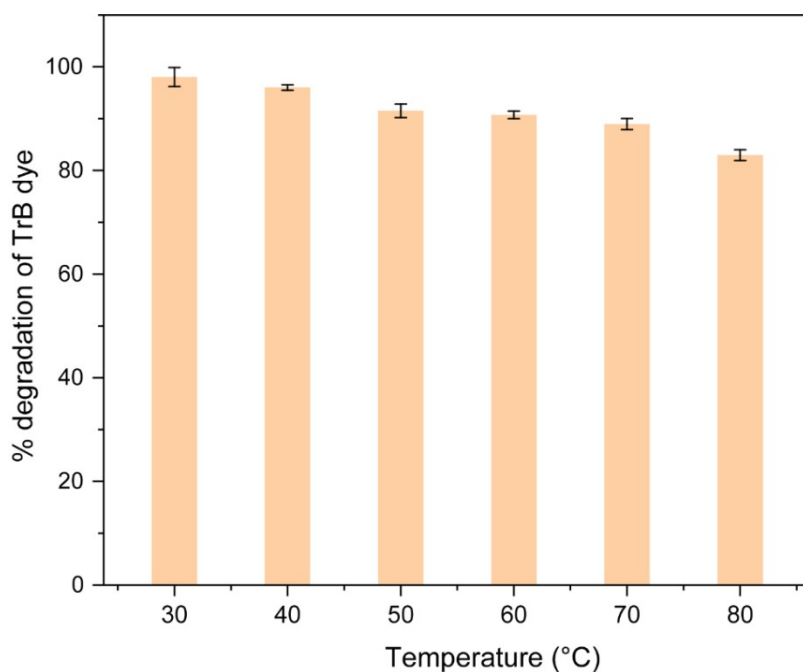

**Fig. S28.** Effect of temperature on % of trypan blue degradation.

**Table S1.** Comparison of the kinetic parameters between **NanoPtA** and reported oxidase, and oxidase-mimicking nanozymes.

| Catalysts and Substrate                  | $K_m$ (mM) | $V_{max}$ ( $10^{-8} \text{ Ms}^{-1}$ ) | Reference |
|------------------------------------------|------------|-----------------------------------------|-----------|
| Dex-FeMnzyme (TMB)                       | 0.33       | 13.29                                   | 1         |
| CeO <sub>2</sub> NPs (TMB)               | 3.8        | 70                                      | 2         |
| Fe-N/C (TMB)                             | 0.94       | 59.8                                    | 3         |
| Fe-Co-LDH (TMB)                          | 0.34       | 5.4                                     | 4         |
| Fe single atom nanozyme (TMB)            | 0.13       | 2.25                                    | 5         |
| Mn <sub>3</sub> O <sub>4</sub> NPs (TMB) | 0.025      | 5.07                                    | 6         |
| Pd cage (TMB)                            | 0.24       | 7.084                                   | 7         |
| <b>NanoPtA</b> (TMB)                     | 0.030      | 10.5                                    | This Work |

## References

1. X. Han, L. Liu, H. Gong, L. Luo, Y. Han, J. Fan, C. Xu, T. Yue, J. Wang and W. Zhang, *Food Chem.*, 2022, **371**, 131115.
2. A. Asati, S. Santra, C. Kaittanis, S. Nath and J. M. Perez, *Angewandte Chemie International Edition*, 2009, **48**, 2308-2312.
3. Q. Chen, S. Li, Y. Liu, X. Zhang, Y. Tang, H. Chai and Y. Huang, *Sensors and Actuators B: Chemical*, 2020, **305**, 127511.
4. X. Xu, X. Zou, S. Wu, L. Wang, J. Pan, M. Xu, W. Shan, X. Li and X. Niu, *Microchimica Acta*, 2019, **186**, 815.
5. C. Zhao, C. Xiong, X. Liu, M. Qiao, Z. Li, T. Yuan, J. Wang, Y. Qu, X. Wang, F. Zhou, Q. Xu, S. Wang, M. Chen, W. Wang, Y. Li, T. Yao, Y. Wu and Y. Li, *Chemical Communications*, 2019, **55**, 2285-2288.
6. X. Zhang and Y. Huang, *Analytical Methods*, 2015, **7**, 8640-8646.
7. S. Bhattacharyya, S. R. Ali, M. Venkateswarulu, P. Howlader, E. Zangrando, M. De and P. S. Mukherjee, *Journal of the American Chemical Society*, 2020, **142**, 18981-18989.
